1 COVID-19 lockdowns cause global air pollution declines with  
2 implications for public health risk

3 Authors

4 Zander S. VENTER<sup>1</sup>; Kristin AUNAN<sup>2</sup>; Sourangsu CHOWDHURY<sup>3</sup>; Jos LELIEVELD<sup>3,4</sup>

5 Affiliations:

6 <sup>1</sup> Terrestrial Ecology Section, Norwegian Institute for Nature Research - NINA, 0349 Oslo,  
7 Norway

8 <sup>2</sup> CICERO Center for International Climate Research, PO Box 1129 Blindern, N318 Oslo,  
9 Norway

10 <sup>3</sup> Department of Atmospheric Chemistry, Max Planck Institute for Chemistry, 55128 Mainz,  
11 Germany

12 <sup>4</sup> Climate and Atmosphere Research Center, The Cyprus Institute, 1645 Nicosia

13 ORCIDs:

14 <https://orcid.org/0000-0003-2638-7162> (ZSV)

15 <https://orcid.org/0000-0002-7865-9134> (KA)

16 <https://orcid.org/0000-0002-4600-2226> (SC)

17

18 <https://orcid.org/0000-0001-6307-3846> (JL)

19 Key words:

20 *COVID-19; Particulate matter; Pediatric asthma; Mortality; Nitrogen dioxide; Ozone*

21

22

23

## 24 Abstract

25 The lockdown response to COVID-19 has caused an unprecedented reduction in global economic  
26 activity. We test the hypothesis that this has reduced tropospheric and ground-level air pollution  
27 concentrations using satellite data and a network of >10,000 air quality stations. After accounting  
28 for the effects of meteorological variability, we find remarkable declines in ground-level nitrogen  
29 dioxide (NO<sub>2</sub>: -29 % with 95% confidence interval -44% to -13%), ozone (O<sub>3</sub>: -11%; -20% to -2%)  
30 and fine particulate matter (PM<sub>2.5</sub>: -9%; -28% to 10%) during the first two weeks of lockdown (n =  
31 27 countries). These results are largely mirrored by satellite measures of the troposphere  
32 although long-distance transport of PM<sub>2.5</sub> resulted in more heterogeneous changes relative to  
33 NO<sub>2</sub>. Pollutant anomalies were related to short-term health outcomes using empirical exposure-  
34 response functions. We estimate that there was a net total of 7400 (340 to 14600) premature  
35 deaths and 6600 (4900 to 7900) pediatric asthma cases avoided during two weeks post-  
36 lockdown. In China and India alone, the PM<sub>2.5</sub>-related avoided premature mortality was 1400  
37 (1100 to 1700) and 5300 (1000 to 11700), respectively. Assuming that the lockdown-induced  
38 deviations in pollutant concentrations are maintained for the duration of 2020, we estimate 0.78  
39 (0.09 to 1.5) million premature deaths and 1.6 (0.8 to 2) million pediatric asthma cases could be  
40 avoided globally. While the state of global lockdown is not sustainable, these findings illustrate  
41 the potential health benefits gained from reducing “business as usual” air pollutant emissions from  
42 economic activities. Explore trends here: [www.covid-19-pollution.zsv.co.za](http://www.covid-19-pollution.zsv.co.za)

## 43 Significance statement

44 The global response to the COVID-19 pandemic has resulted in unprecedented reductions in  
45 economic activity. We find that lockdown events have reduced air pollution levels by  
46 approximately 20% across 27 countries. The reduced air pollution levels come with a substantial  
47 health co-benefit in terms of avoided premature deaths and pediatric asthma cases that  
48 accompanied the COVID-19 containment measures.

## 49 Introduction:

50 In many developing nations economic growth has exacerbated air pollutant emissions with severe  
51 consequences for the environment and human health. Long-term exposure to air pollution  
52 including fine particulate matter with a diameter less than 2.5µm (PM<sub>2.5</sub>) and ozone (O<sub>3</sub>) are  
53 estimated to cause ~8.8 million excess deaths annually (1, 2), while nitrogen dioxide (NO<sub>2</sub>) results  
54 in 4 million new paediatric asthma cases annually (3). Despite the apparent global air pollution  
55 “pandemic”, anthropogenic emissions remain on positive trajectories for most developing and  
56 some developed nations (4–6).

57  
58 The major ambient (outdoor) air pollution sources include power generation, industry, traffic, and  
59 residential energy use (4, 7). With the rapid emergence of the novel coronavirus (COVID-19), and  
60 in particular the government enforced lockdown measures aimed at containment, economic  
61 activity has come to a near-complete standstill in many countries (8). Lockdown measures have  
62 included partial or complete closure of international borders, schools, non-essential business and  
63 in some cases restricted citizen mobility (9). The associated reduction in traffic and industry has

64 both socio-economic and environmental impacts which are yet to be quantified. In parallel to the  
65 societal consequences of the global response to COVID-19, there is an unprecedented  
66 opportunity to estimate the short-term effects of economic activity counterfactual to “business as  
67 usual” on global air pollution and its relation to human health.

68  
69 Here we test the hypothesis that reduced air pollution levels during Feb/Mar 2020 were related to  
70 the COVID-19 lockdown events. To test the hypothesis, satellite data are used to provide a global  
71 perspective over Feb/Mar, but to estimate exposure levels relevant to public health, we derive  
72 ground-level measurements from >10,000 air quality stations after accounting for meteorological  
73 variations. The air pollution anomalies during COVID-19 lockdown are then used to quantify  
74 mortality and pediatric asthma incidence that have been potentially avoided (Fig. S1). Finally we  
75 perform a counterfactual projection of the public health burden assuming NO<sub>2</sub>, O<sub>3</sub> and PM<sub>2.5</sub>  
76 anomalies during lockdown are maintained for the remainder of 2020. In doing this we do not  
77 imply that lockdown economic activity is sustainable or desirable, however, we do intend to use  
78 the current situation as an intuitive means of highlighting the significance of the often-overlooked  
79 global air pollution health crisis.

## 80 Results and discussion:

### 81 **Satellite-derived global trends**

82 Satellite-measured tropospheric NO<sub>2</sub> concentrations have decreased by an average of 10.7%  
83 (area-weighted mean with interquartile range; IQR: 32%) over inhabited areas of the globe during  
84 Feb/Mar 2020 relative to 2019 (Fig. 1A; Fig. S2). The percentage changes over areas most  
85 affected by COVID-19, including Europe and China, showed NO<sub>2</sub> declines of 20% (38% IQR) and  
86 12% (33% IQR), respectively. In contrast to NO<sub>2</sub>, O<sub>3</sub> concentrations exhibit a net positive anomaly  
87 of +2.4% (8.4% IQR) in 2020 relative to 2019 (Fig. 1C; Fig. S2). This may be related to the  
88 emission decline of NO<sub>x</sub> (=NO+NO<sub>2</sub>), mostly as NO, leading to reduced local titration of O<sub>3</sub>  
89 (reaction of NO with O<sub>3</sub>). The O<sub>3</sub> titration effect is relevant locally and within the planetary  
90 boundary layer, whereas further downwind photochemical O<sub>3</sub> formation, with a catalytic role of  
91 NO<sub>x</sub>, is a more important factor. Note that lockdown impacts on NO<sub>2</sub>, which has an atmospheric  
92 lifetime of about a day, are clearly discernible locally, whereas those on O<sub>3</sub> with a lifetime of  
93 several weeks are affected by long-distance transport associated with specific weather patterns.  
94 Further, O<sub>3</sub> photochemistry in temperate latitudes during the Feb/Mar period is still slow due to  
95 low solar irradiation, whereas at lower latitudes O<sub>3</sub> buildup can be significant.

96  
97 Similarly, aerosol optical depth (AOD: a proxy for PM<sub>2.5</sub>) has also increased slightly (+13.2% IQR:  
98 35%), although local declines are evident over parts of China (Fig. 1E; Fig. S2). While the  
99 lockdown impacts on NO<sub>2</sub> and on ground-level O<sub>3</sub> in inhabited regions are largely due to local  
100 emissions, PM<sub>2.5</sub> is less locally controlled as it has an atmospheric lifetime of several days or  
101 longer in the absence of rain. For instance, European AOD levels during March 2020 were  
102 strongly influenced by dry weather with easterly winds, which carried mineral dust from West Asia,  
103 which explains some of the positive anomalies in this period. Since much of the long-distance  
104 dust transport takes place above the boundary layer (10), these AOD anomalies do not  
105 necessarily represent ground-level PM<sub>2.5</sub> trends. The same is true for satellite-measured O<sub>3</sub>,

106 which is strongly influenced by its generally increasing abundance above the boundary layer,  
107 especially during winter.

108

### 109 **Ground-level country-specific trends**

110 While satellites provide global data coverage, they do not necessarily reflect pollutant  
111 concentrations at ground-level that are relevant to human exposure and health. Therefore we  
112 supplemented satellite data with ground-level pollutant concentrations collected by over 10,000  
113 air quality stations. In contrast to the satellite data we used, station data allowed us to calculate a  
114 more robust 3-year baseline measure of expected pollution levels for Feb/Mar. These data largely  
115 corroborate the satellite data in that we found the same spatial patterns and net directions of  
116 Feb/Mar 2020 pollutant anomalies (Fig. 1 B, D and F). Specifically, NO<sub>2</sub> declined by 22.9% (20%  
117 IQR) which equates to an absolute decline of 7.6 µg m<sup>-3</sup> (9 µg m<sup>-3</sup> IQR). O<sub>3</sub> increased by 5.4%  
118 (18% IQR) whereas particulate matter (PM<sub>2.5</sub>) declined by 17.2% (30% IQR). The direction and  
119 magnitude of PM<sub>2.5</sub> change near the surface is different to the AOD measured by satellites,  
120 highlighting the importance of ground-level measurements to complement satellite-derived global  
121 trends.

122

123 Focusing on the ground-level trends is illustrative of the change at both global (Fig. 2A - C) and  
124 country (Fig. 2 D - F; Fig. S3) scales. Here, the deviation in NO<sub>2</sub> and PM<sub>2.5</sub> levels from 3-yr average  
125 values increases significantly from mid-Jan onward (Fig. 2). The timing of the initial deviation is  
126 potentially an effect of the dramatic air pollution reductions in China (Fig. 2D; Fig. S4) coincident  
127 with the rapid lockdown response in Wuhan province at the outset of COVID-19. Thereafter, the  
128 spread of COVID-19 led to lockdowns in various countries, associated with a greater negative  
129 deviation in NO<sub>2</sub> and PM<sub>2.5</sub> from 3-yr baseline values (Fig. 2). Some notable outliers include  
130 Australia and Mexico. Australia exhibited drastic declines in PM<sub>2.5</sub> from January onward likely  
131 reflecting the tail-end of the recent wildfires (11). The rapid decline in NO<sub>2</sub> over Mexican stations  
132 is more difficult to explain, particularly given that Mexico, along with Taiwan, Slovakia and  
133 Sweden, was one of the few countries not to enforce any national lockdown measures.

134

135 The trends for O<sub>3</sub> and PM<sub>2.5</sub> are more heterogeneous over space (Fig. 1D, F) and time (Fig. 2E,  
136 F) relative to the ubiquitous declines in NO<sub>2</sub>. For instance, increases in O<sub>3</sub> over southern China  
137 differ significantly from the decreases observed over the Wuhan province, the epicenter of  
138 COVID-19 (Fig. 1D). We expect this to be a consequence of synoptic redistribution of O<sub>3</sub> by  
139 atmospheric circulations. Similarly, the local decreases over parts of Spain are in contrast to  
140 increases observed over eastern Europe. This is not surprising given that O<sub>3</sub> is affected by long-  
141 distance transport as well as non-linear chemical interactions with volatile organic compounds  
142 (VOCs) and NO<sub>x</sub>, mediated by mesoscale and urban canopy weather patterns (12).

143

### 144 **Direct links to COVID-19 lockdown and health outcomes**

145 To test our primary hypothesis that pollution anomalies were directly associated with COVID-19  
146 lockdown events, we calculated average ground-level concentrations for each country separately.  
147 Instead of averaging over Feb/Mar, we focus on the two weeks after lockdowns were announced  
148 in each country. We first corrected for the effects of local and meso-scale weather patterns  
149 (temperature, humidity, precipitation and wind speed) which can significantly affect ground-level

150 pollutant concentrations (13, 14) and thereby compromise any observable effect of COVID-19  
151 lockdowns. Using regression models, we estimated the lockdown-attributable anomaly (Fig. S1)  
152 as the difference between observed and expected pollutant concentrations given weather during  
153 lockdown.

154  
155 We found a net decline of about 20% (5% to 35% - 95% confidence interval) across all three  
156 pollutants in countries where significant anomalies were detected. There were significant declines  
157 in NO<sub>2</sub> (29 %; 13% to 44%) and O<sub>3</sub> (11%; 2% to 20%), however our model estimates were not  
158 able to control for the confounding effects of weather enough to detect significant declines in PM<sub>2.5</sub>  
159 (9% decline; -10 to 28%; Fig. S5). Indeed, our meteorological-control models were able to explain  
160 less of the variance in PM<sub>2.5</sub> (R<sup>2</sup> = 0.45) compared to NO<sub>2</sub> (R<sup>2</sup> = 0.54) and O<sub>3</sub> (R<sup>2</sup> = 0.72; Table  
161 S1). This suggests PM<sub>2.5</sub> has a weaker coupling to land-transportation and small business activity  
162 declines during lockdown compared to NO<sub>2</sub> and O<sub>3</sub>. In Many countries PM<sub>2.5</sub> is more strongly  
163 linked to residential energy use, power generation and agriculture (7). In addition, PM<sub>2.5</sub> is  
164 significantly influenced by long-distance atmospheric transport of mineral dust and therefore the  
165 local effects of economic activity may be diluted or even overwhelmed (15).

166  
167 Using the two week post-lockdown anomalies in combination with published exposure-response  
168 functions for NO<sub>2</sub> (16, 17), O<sub>3</sub> (17, 18) and PM<sub>2.5</sub> (17, 19), we estimated changes in daily all-cause  
169 mortality burden and pediatric asthma incidence. During the two weeks post-lockdown, there were  
170 a total of 7400 (340 to 14600) deaths and 6600 (4900 to 7900) pediatric asthma cases avoided  
171 across 27 countries with recorded COVID-19 mitigation measures (Fig. 3; Table S2). The number  
172 of PM<sub>2.5</sub>-related deaths avoided (6800; 60 to 13700) exceeded those related to NO<sub>2</sub> (540; 300 to  
173 800) and O<sub>3</sub> (50; 10 to 80). While for pediatric asthma incidence, NO<sub>2</sub> reductions contributed to  
174 more avoided cases (5700; 4500 to 6800) compared to O<sub>3</sub> (50; 40 to 60) and PM<sub>2.5</sub> (850; 300 to  
175 1000). In China and India alone, the PM<sub>2.5</sub>-related reductions in mortality burden were 1400 (1100  
176 to 1700) and 5300 (1000 to 11700), respectively (Fig. 3C). These are countries with both the  
177 highest baseline pollution levels and population densities, and therefore have the most to gain  
178 from pollutant declines.

179  
180 Furthermore, we performed a counterfactual projection of reduced health burden assuming  
181 ground-level air pollution deviations experienced during lockdown (Fig. S5) are maintained for the  
182 remainder of 2020 (Apr-Dec). The cumulative effect of the reduction in NO<sub>2</sub>, O<sub>3</sub> and PM<sub>2.5</sub> over  
183 the remainder of 2020 is that 0.78 (0.09 to 1.5) million deaths and 1.6 (0.8 to 2) million pediatric  
184 asthma cases could be avoided (Fig. 4; Table S3). Our findings suggest that, in spite of the  
185 modest response of PM<sub>2.5</sub>, countries would have much to gain in maintaining PM<sub>2.5</sub> lockdown  
186 levels because that would prevent 0.6 (0.01 to 1.3) million deaths and 1.1 (0.4 to 1.4) million  
187 pediatric asthma cases which is 3- and 5-fold higher than those from NO<sub>2</sub> and 5- and 30-fold  
188 higher than those from O<sub>3</sub> (Fig. 4). The bulk of the benefit gained would take place during the  
189 latter half of the year when air pollution levels are at their highest over countries with the largest  
190 air pollution health burden (i.e. India and China).

191  
192 **Limitations and perspectives**

193 Making explicit links between ambient air pollution and human health burden relies on several  
194 assumptions that are difficult to verify *a priori*. First, using relative risk rates from select meta-  
195 analysis (17) and multi-city ( $n > 406$ ) short-term time-series association studies (18, 19) to make  
196 inference over entire countries rests on the assumption that city- or cohort-specific response rates  
197 are generalizable to broader populations. While this is likely to introduce uncertainty, the dearth  
198 of representative data necessitates these generalizations, and this approach has been used by  
199 numerous studies at the global scale (2, 3). Further, we acknowledge that our results are affected  
200 by harvesting effects, where premature deaths attributed to air pollution might have occurred in  
201 the immediate future (20). Note that this also applies to death counts attributed to COVID-19. We  
202 also acknowledge that we do not account for indoor sources of PM<sub>2.5</sub> pollution which are unlikely  
203 to be reduced by lockdown measures. As smoke from household stoves add substantially to  
204 population exposure for people dependent on solid fuels, accounting for ambient air pollution only  
205 could imply a misclassification of exposure and biased health burden estimates (21). Finally, the  
206 baseline mortality rates we use are from 2017 (22) and therefore may be prone to ignoring before  
207 and after COVID-19 onset differences in baseline mortality incidence.

208  
209 Despite these assumptions and the associated uncertainty, the analysis and results presented  
210 here can provide useful insights to raise awareness and orientate interventions regarding the  
211 global effects of air pollution on human health. They should be interpreted as preliminary lessons  
212 from the Corona crisis. As the science evolves, and the COVID-19 pandemic plays out, empirical  
213 data will emerge to fill in the knowledge gaps and uncertainties associated with air pollution health  
214 burden attribution. It is expected that the two-week lockdown effects calculated here will be an  
215 underestimate of the full effect because most lockdowns will likely last much longer than two  
216 weeks. Further, we were not able to calculate the extent to which air pollution reductions have  
217 mitigated COVID-19 deaths. For instance, positive associations have been reported between air  
218 pollution and SARS case fatalities in China during 2003 (23) and preliminary analysis has  
219 revealed similar patterns for COVID-19 (24, 25). Therefore our estimates may represent lower  
220 limits after considering the air pollution reductions as a cofactor in COVID-19 case recoveries.

## 221 Conclusions:

222 Reducing economic activity to levels equivalent to a lockdown state are impractical, yet  
223 maintaining “business as usual” clearly exacerbates global pollutant emissions and associated  
224 deaths. Our study documents the dramatic short-term effect of global reductions in transport and  
225 economic activity on reducing ground-level NO<sub>2</sub>, with mixed effects on O<sub>3</sub> and PM<sub>2.5</sub>  
226 concentrations. Maintaining reductions in pollutant emissions corresponding to lockdown  
227 conditions can substantially reduce the global burden of disease. We by no means imply that  
228 global pandemics such as the COVID-19, nor lockdown actions, are beneficial for public health.  
229 However, we suggest the current situation is a useful lens through which to view the global air  
230 pollution “pandemic”. Time will tell how significant the change in health burden has actually been.  
231 Nevertheless, the early evidence presented here suggests it is likely significant. Reduced  
232 premature mortality from air pollution thus appears as a co-benefit of the minimized number of  
233 deaths from the lockdown measures, although more accurate, quantitative assessments must  
234 await termination of the crisis. Finding economically and socially sustainable alternatives to fossil

235 fuel based transport and industry are another means of reaching the pollutant declines we have  
236 observed during the global response to COVID-19.

## 237 Materials and methods:

238 In brief, the methodological workflow (Fig. S1) described below involves collecting satellite and  
239 in-situ air pollution time series data to estimate anomalies during the 2020 COVID-19 period  
240 relative to different baseline levels. Regression models are used to correct for the potential effects  
241 of weather-related variations on pollutant levels during lockdown. The resulting estimates of  
242 pollutant anomalies are related to established health burden estimates for short-term premature  
243 mortality and pediatric asthma incidence attributable to air pollution. The sample of countries used  
244 in each step varies dependent on the data availability. Results for satellite data contain all  
245 countries ( $n = 196$ ). For ground-station anomalies there were 30 countries in total, however  
246 lockdown anomalies and health burden statistics are only reported for those with recorded  
247 lockdown measures ( $n = 27$ ).

248

### 249 Satellite data

250 All remote sensing data analyses were conducted in the Google Earth Engine platform for  
251 geospatial analysis and cloud computing (26). All data was extracted at a global scale and  
252 aggregated to the mean for each country. Data outside of inhabited areas (ocean, freshwater,  
253 desert etc.) were excluded from the analysis using the Global Human Settlement Layer produced  
254 by the European Joint Research Centre which defines inhabited rural and urban terrestrial areas  
255 (27). We did this because our main hypothesis was linked to human exposure and therefore we  
256 aimed at pollution measures that were relevant to inhabited land surfaces.

257

258 We collected nitrogen dioxide ( $\text{NO}_2$ ) and ozone ( $\text{O}_3$ ) data from the TROPOspheric Monitoring  
259 Instrument (TROPOMI), on-board the Sentinel-5 Precursor satellite (28). TROPOMI has delivered  
260 calibrated data since July 2018 from its nadir-viewing spectrometer measuring reflected sunlight  
261 in the visible, near-infrared, ultraviolet, and shortwave infrared. Recent work has shown that  
262 TROPOMI measurements are well correlated to ground measures of  $\text{NO}_2$  (29, 30) and  $\text{O}_3$  (31).  
263 We filtered out pixels that are fully or partially covered by clouds using 0.3 as a cutoff for the  
264 radiative cloud fraction. As a proxy for atmospheric fine particulate matter ( $\text{PM}_{2.5}$ ), we collected  
265 aerosol optical depth (AOD) data from the cloud-masked MCD19A2.006 Terra and Aqua MAIAC  
266 collection (32). This dataset has been successfully used to map ground-level  $\text{PM}_{2.5}$  concentrations  
267 (33, 34). Global median composite images for  $\text{NO}_2$ ,  $\text{O}_3$  and AOD were then calculated for the  
268 months of February and March 2019 and 2020.

269

### 270 In-situ data

271 Although satellite data have the advantage of wall-to-wall global coverage, there are some  
272 drawbacks: (1) TROPOMI does not extend back far enough to obtain an adequate baseline  
273 measure with which to compare 2020 concentrations; (2) MODIS and TROPOMI collect  
274 information within either the total ( $\text{O}_3$  and AOD) or tropospheric ( $\text{NO}_2$ ) column which do not  
275 necessarily reflect pollutant levels experienced on the ground. Therefore, we also collected  $\text{NO}_2$ ,  
276  $\text{O}_3$  and  $\text{PM}_{2.5}$  data from >10,000 in-situ air quality monitoring stations to supplement the satellite

277 data. These data were accessed from the OpenAQ Platform and originate from government- and  
278 research-grade sources. See [www.openaq.org](http://www.openaq.org) for a list of sources. Despite the reliability of the  
279 sources, we inspected pollutant time series for each country and removed spurious outliers in the  
280 data with z-scores exceeding an absolute value of 3. Following quality control, we were left with  
281 data representing 30 countries.

282

### 283 **Quantifying air pollution anomalies**

284 We used two approaches to quantify air pollution anomalies coincident with COVID-19 during  
285 Feb/Mar 2020. We refer to these as (1) the Feb/Mar differential, and (2) the lockdown differential  
286 (Fig. S1). For the Feb/Mar differential we calculated average pollutant levels for Feb/Mar each  
287 year between 2017 and 2020. The differential was defined as the difference between 2020 values  
288 and the average of those for a 3-year baseline (2017-2019). For satellite data the baseline was  
289 the 2019 Feb/Mar average due to limited temporal extent of TROPOMI data, however for ground-  
290 stations we considered a 3-year (2017-2019) average for the Feb/Mar period.

291

292 Air pollution anomalies measured with the Feb/Mar differential approach may smooth over the  
293 effect of COVID-19 given that country-specific lockdowns or mitigation actions occurred at  
294 different times. For instance China went into lockdown in Jan/Feb whereas the majority of  
295 lockdowns in other countries occurred in March. Therefore we attempted to isolate the effect of  
296 COVID-19 mitigation measures by calculating lockdown pollutant levels for each country  
297 separately. We searched online media and news articles to identify the starting date of lockdown  
298 for each country. Sources were cross-referenced to account for erroneous reporting. We defined  
299 two levels of lockdown intensity including moderate and severe lockdowns. Moderate lockdowns  
300 involved partial or full closure of borders and flights, government advisories for citizens to work  
301 from home, closure of schools, and limiting gathering sizes. Severe lockdowns included  
302 government-enforced movement restrictions or curfews and closure of all non-essential  
303 businesses. This resulted in a sample of 27 countries that reported lockdown measures and which  
304 we had ground-level air pollution data for.

305

306 Air pollution anomalies measured during two weeks post-lockdown are not necessarily  
307 attributable to reduced economic activity, but may be an artifact of meteorological variability  
308 coincident with the onset of COVID-19. Therefore we adopted a modelled differential approach to  
309 correct for the effect of meteorological parameters on air pollution trends. This involved  
310 developing a model based on historical data to estimate what the expected air pollution levels for  
311 2020 lockdown dates should have been given the prevailing weather conditions and time of year.  
312 We performed multiple linear regression of weekly pollutant concentrations on temperature,  
313 humidity, precipitation and wind speed derived from the Global Forecast System (GFS) of the  
314 National Centers for Environmental Prediction (NCEP) between Jan 2017 and Apr 2020. We  
315 accounted for the effect of seasonal fluctuations and long-term trends by including month and  
316 year as fixed effects in the model. We calculated the sin and cos component of the month variable  
317 to account for its cyclical nature. Using models trained on historical data, we predicted the  
318 expected pollutant levels for the two lockdown weeks. The modelled differential is then the  
319 difference between this predicted value and the observed pollutant concentrations during



320 lockdown (Fig. S1). This differential has been attributed to COVID-19 mitigation measures with  
321 greater confidence than simple comparisons with 3-yr baseline values.

322

### 323 **Linking air pollution anomalies to public health burden**

324 To relate COVID-19 lockdown air pollution anomalies to all-cause mortality and pediatric asthma  
325 incidence we applied short-term (daily) exposure-response relationships reported in recent  
326 literature. We obtained relative risks from recent studies on the relationship between daily  
327 mortality and O<sub>3</sub> (18) and PM<sub>2.5</sub> (19) resulting from the Multi-City Multi- Country (MCC)  
328 Collaborative Research Network (35). For NO<sub>2</sub>-mortality responses, we used relative risks  
329 reported in a meta-analysis which controlled for the effect of particulate matter to extract excess  
330 mortality solely attributable to NO<sub>2</sub> (16). Pediatric (< 18 years) short-term relative risks for asthma  
331 incidence in response to NO<sub>2</sub>, O<sub>3</sub> and PM<sub>2.5</sub> were derived from a global meta-analysis of 87  
332 studies (17). These data are not country-specific and we therefore applied the same relative risk  
333 rate to all countries in our study.

334 Daily health burden (premature mortality and asthma incidence) for each country was derived  
335 with the formula:

$$HB = Inc \times Pop \times \frac{(RR - 1)}{RR}$$

336

337 Where *Inc* is the baseline mortality or asthma incidence rate and *Pop* is the total population. *Inc*  
338 for mortality and asthma were obtained from the Institute for Health Metrics and Evaluation (IHME)  
339 for the 27 countries in our study (22), downloadable at the GDBx platform  
340 (<http://ghdx.healthdata.org/>). Population estimates for 2020 were calculated using the Gridded  
341 Population of the World (GPWv14) dataset (36). *RR* is the relative risk derived from the literature  
342 after log-linear transformation. We used log-linear transformation as adopted by many others (3,  
343 37) to prevent assumptions of linearity in the relationship between pollutant concentrations and  
344 health outcome. We derive the transformed *RR* using:

$$RR = e^{-\beta \times (\alpha - \gamma)}$$

345

346 where  $\alpha$  is the pollutant concentration and  $\gamma$  is the low concentration threshold below which there  
347 is no risk of mortality or asthma incidence. Low concentration thresholds were derived from the  
348 associated literature for O<sub>3</sub> at 70  $\mu\text{g m}^{-3}$  (18); PM<sub>2.5</sub> at 4.1  $\mu\text{g m}^{-3}$  (19) and NO<sub>2</sub> at 2 ppb (3). Here  
349  $\beta$  is defined by the function:

$$\beta = \frac{\ln \lambda}{\delta}$$

350

351 where  $\lambda$  is the relative risk reported in the literature and  $\delta$  is the concentration increment used. All  
352 three studies reported results relative to a of 10  $\mu\text{g m}^{-3}$ .

353 The air pollution health burden anomaly coincident with COVID-19 lockdown was defined as:

$$\Delta HB = \overline{HB}_{2020 \text{ lockdown}} - \overline{HB}_{2017-2019 \text{ DOY lockdown}}$$

354

355 Where *DOY* is the days-of-year equivalent for each country's two weeks lockdown dates. We use  
356 95% confidence intervals reported in the literature to derive error margins around our change  
357 estimates. Health burden estimates are made for each day during lockdown events during 2020  
358 and the past three years for comparison. We also perform a counterfactual forecasting  
359 assessment for 2020 where we assume the lockdown reductions in NO<sub>2</sub>, O<sub>3</sub>, PM<sub>2.5</sub> are sustained  
360 for the remainder of the year. Using the resulting daily forecasts we calculated the total avoidable  
361 air pollution related mortalities and new asthma incidence.

362

## 363 References

- 364 1. R. Burnett, *et al.*, Global estimates of mortality associated with long-term exposure to  
365 outdoor fine particulate matter. *Proc. Natl. Acad. Sci.* **115**, 9592–9597 (2018).
- 366 2. J. Lelieveld, *et al.*, Loss of life expectancy from air pollution compared to other risk factors:  
367 a worldwide perspective. *Cardiovasc. Res.* (2020) <https://doi.org/10.1093/cvr/cvaa025>  
368 (March 30, 2020).
- 369 3. P. Achakulwisut, M. Brauer, P. Hystad, S. C. Anenberg, Global, national, and urban  
370 burdens of paediatric asthma incidence attributable to ambient NO<sub>2</sub> pollution: estimates  
371 from global datasets. *Lancet Planet. Health* **3**, e166–e178 (2019).
- 372 4. M. Crippa, *et al.*, Gridded emissions of air pollutants for the period 1970–2012 within  
373 EDGAR v4.3.2. *Earth Syst. Sci. Data* **10**, 1987–2013 (2018).
- 374 5. R. M. Hoesly, *et al.*, Historical (1750–2014) anthropogenic emissions of reactive gases and  
375 aerosols from the Community Emissions Data System (CEDS). *Geosci. Model Dev.* **11**,  
376 369–408 (2018).
- 377 6. C. Li, *et al.*, India Is Overtaking China as the World's Largest Emitter of Anthropogenic  
378 Sulfur Dioxide. *Sci. Rep.* **7**, 1–7 (2017).
- 379 7. J. Lelieveld, J. S. Evans, M. Fnais, D. Giannadaki, A. Pozzer, The contribution of outdoor  
380 air pollution sources to premature mortality on a global scale. *Nature* **525**, 367–371 (2015).
- 381 8. J. Cohen, K. Kupferschmidt, Strategies shift as coronavirus pandemic looms. *Science* **367**,  
382 962–963 (2020).
- 383 9. E. Pepe, *et al.*, COVID-19 outbreak response: a first assessment of mobility changes in  
384 Italy following national lockdown. *medRxiv*, 2020.03.22.20039933 (2020).
- 385 10. Convention on Long-range Transboundary Air Pollution, United Nations, F. Dentener, T.  
386 Keating, H. Akimoto, *Hemispheric transport of air pollution 2010: Part A-ozone and*  
387 *particulate matter* (UN, 2010).

- 388 11. C. E. Reid, *et al.*, Associations between respiratory health and ozone and fine particulate  
389 matter during a wildfire event. *Environ. Int.* **129**, 291–298 (2019).
- 390 12. M. E. Marlier, A. S. Jina, P. L. Kinney, R. S. DeFries, Extreme Air Pollution in Global  
391 Megacities. *Curr. Clim. Change Rep.* **2**, 15–27 (2016).
- 392 13. J. Dawson, Quiet weather, polluted air. *Nat. Clim. Change* **4**, 664–665 (2014).
- 393 14. D. J. Jacob, D. A. Winner, Effect of climate change on air quality. *Atmos. Environ.* **43**, 51–  
394 63 (2009).
- 395 15. R. B. Khuzestani, *et al.*, Quantification of the sources of long-range transport of PM2.5  
396 pollution in the Ordos region, Inner Mongolia, China. *Environ. Pollut.* **229**, 1019–1031  
397 (2017).
- 398 16. I. C. Mills, R. W. Atkinson, H. R. Anderson, R. L. Maynard, D. P. Strachan, Distinguishing  
399 the associations between daily mortality and hospital admissions and nitrogen dioxide from  
400 those of particulate matter: a systematic review and meta-analysis. *BMJ Open* **6**, e010751  
401 (2016).
- 402 17. X. Zheng, *et al.*, Association between Air Pollutants and Asthma Emergency Room Visits  
403 and Hospital Admissions in Time Series Studies: A Systematic Review and Meta-Analysis.  
404 *PloS One* **10**, e0138146 (2015).
- 405 18. A. M. Vicedo-Cabrera, *et al.*, Short term association between ozone and mortality: global  
406 two stage time series study in 406 locations in 20 countries. *BMJ* **368** (2020).
- 407 19. C. Liu, *et al.*, Ambient Particulate Air Pollution and Daily Mortality in 652 Cities. *N. Engl. J.*  
408 *Med.* **381**, 705–715 (2019).
- 409 20. J. Schwartz, Is there harvesting in the association of airborne particles with daily deaths  
410 and hospital admissions? *Epidemiol. Camb. Mass* **12**, 55–61 (2001).
- 411 21. K. Aunan, Q. Ma, M. T. Lund, S. Wang, Population-weighted exposure to PM2.5 pollution  
412 in China: An integrated approach. *Environ. Int.* **120**, 111–120 (2018).
- 413 22. GBD 2015 Chronic Respiratory Disease Collaborators, Global, regional, and national  
414 deaths, prevalence, disability-adjusted life years, and years lived with disability for chronic  
415 obstructive pulmonary disease and asthma, 1990-2015: a systematic analysis for the  
416 Global Burden of Disease Study 2015. *Lancet Respir. Med.* **5**, 691–706 (2017).
- 417 23. Y. Cui, *et al.*, Air pollution and case fatality of SARS in the People's Republic of China: an  
418 ecologic study. *Environ. Health Glob. Access Sci. Source* **2**, 15 (2003).
- 419 24. E. Conticini, B. Frediani, D. Caro, Can atmospheric pollution be considered a co-factor in  
420 extremely high level of SARS-CoV-2 lethality in Northern Italy? *Environ. Pollut.*, 114465  
421 (2020).
- 422 25. X. Wu, R. C. Nethery, B. M. Sabath, D. Braun, F. Dominici, Exposure to air pollution and  
423 COVID-19 mortality in the United States. *medRxiv*, 2020.04.05.20054502 (2020).

- 424 26. N. Gorelick, *et al.*, Google Earth Engine: Planetary-scale geospatial analysis for everyone.  
425 *Remote Sens. Environ.* **202**, 18–27 (2017).
- 426 27. M. Pesaresi, S. Freire, GHS Settlement grid following the REGIO model 2014 in  
427 application to GHSL Landsat and CIESIN GPW v4-multitemporal (1975-1990-2000-2015).  
428 *JRC Data Cat.* (2016).
- 429 28. J. P. Veefkind, *et al.*, TROPOMI on the ESA Sentinel-5 Precursor: A GMES mission for  
430 global observations of the atmospheric composition for climate, air quality and ozone layer  
431 applications. *Remote Sens. Environ.* **120**, 70–83 (2012).
- 432 29. D. Griffin, *et al.*, High-Resolution Mapping of Nitrogen Dioxide With TROPOMI: First  
433 Results and Validation Over the Canadian Oil Sands. *Geophys. Res. Lett.* **46**, 1049–1060  
434 (2019).
- 435 30. A. Lorente, *et al.*, Quantification of nitrogen oxides emissions from build-up of pollution  
436 over Paris with TROPOMI. *Sci. Rep.* **9**, 1–10 (2019).
- 437 31. K. Garane, *et al.*, TROPOMI/S5P total ozone column data: global ground-based validation  
438 and consistency with other satellite missions. *Atmospheric Meas. Tech.* **12**, 5263–5287  
439 (2019).
- 440 32. A. Lyapustin, Y. Wang, S. Korin, D. Huang, MODIS Collection 6 MAIAC algorithm.  
441 *Atmospheric Meas. Tech.* **11**, 5741–5765 (2018).
- 442 33. J. Wei, *et al.*, Estimating 1-km-resolution PM<sub>2.5</sub> concentrations across China using the  
443 space-time random forest approach. *Remote Sens. Environ.* **231**, 111221 (2019).
- 444 34. Y. Zheng, Q. Zhang, Y. Liu, G. Geng, K. He, Estimating ground-level PM<sub>2.5</sub> concentrations  
445 over three megalopolises in China using satellite-derived aerosol optical depth  
446 measurements. *Atmos. Environ.* **124**, 232–242 (2016).
- 447 35. A. Gasparrini, *et al.*, Mortality risk attributable to high and low ambient temperature: a  
448 multicountry observational study. *The Lancet* **386**, 369–375 (2015).
- 449 36. Center for International Earth Science Information Network - CIESIN - Columbia University,  
450 Gridded Population of the World, Version 4 (GPWv4): Population Density, Revision 11  
451 (2018).
- 452 37. Anenberg Susan C., Horowitz Larry W., Tong Daniel Q., West J. Jason, An Estimate of the  
453 Global Burden of Anthropogenic Ozone and Fine Particulate Matter on Premature Human  
454 Mortality Using Atmospheric Modeling. *Environ. Health Perspect.* **118**, 1189–1195 (2010).

455  
456

457

458

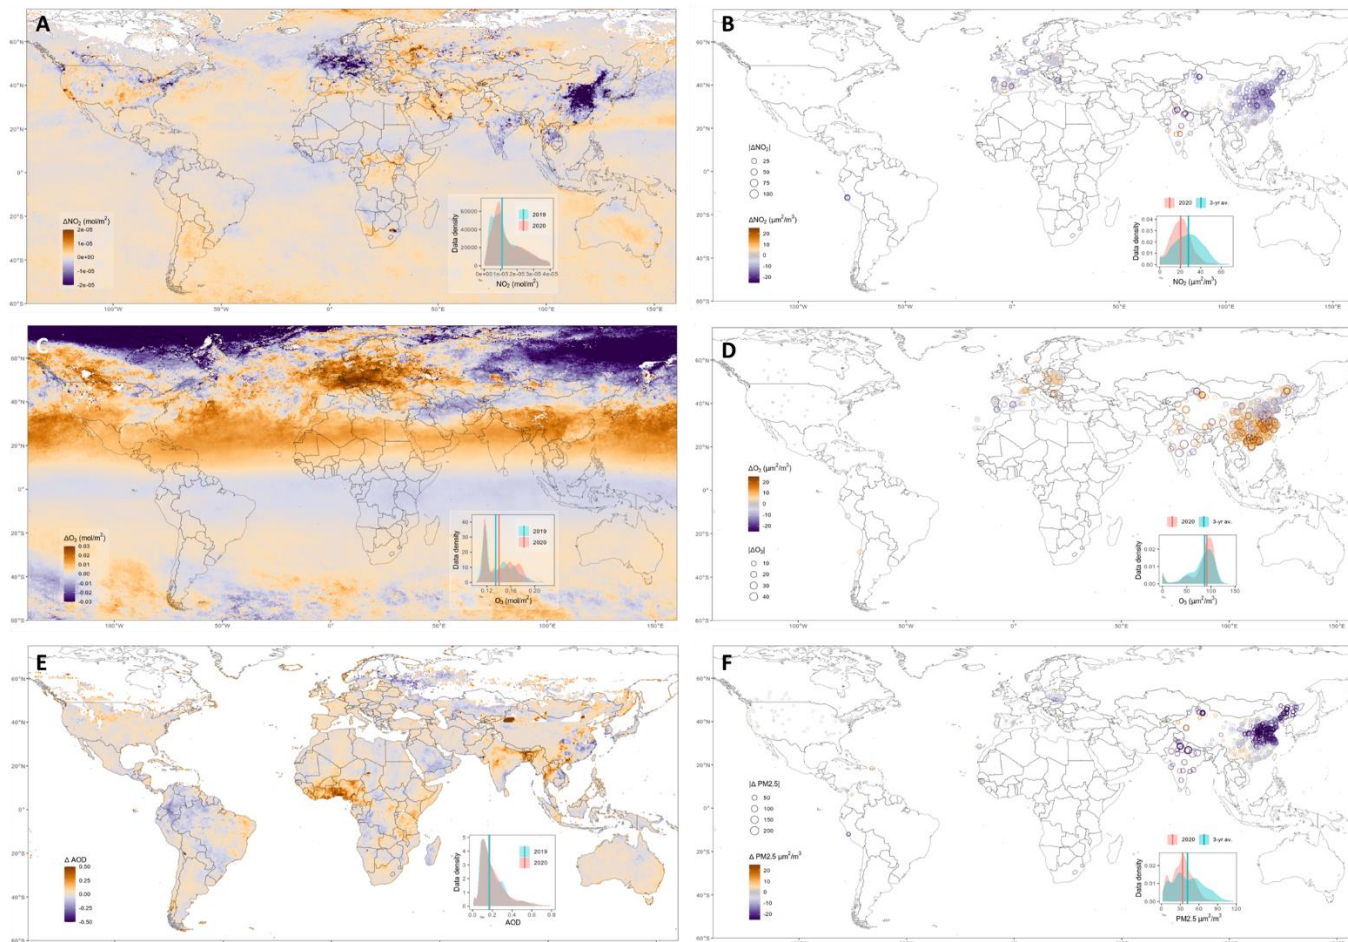

459  
460  
461  
462  
463  
464  
465  
466  
467  
468

**Fig. 1: Global distribution of 2020 air pollution anomalies.** Satellite and ground station measures of  $\text{NO}_2$  (A,B),  $\text{O}_3$  (C, D), aerosol optical depth (E) and  $\text{PM}_{2.5}$  (F) anomalies are mapped. Anomalies are defined as 2020 deviations from Feb/Mar 2019 average for satellite data and from Feb/Mar 3-yr averages for ground stations. Inset plots show data density distributions for anomalies over inhabited land areas.

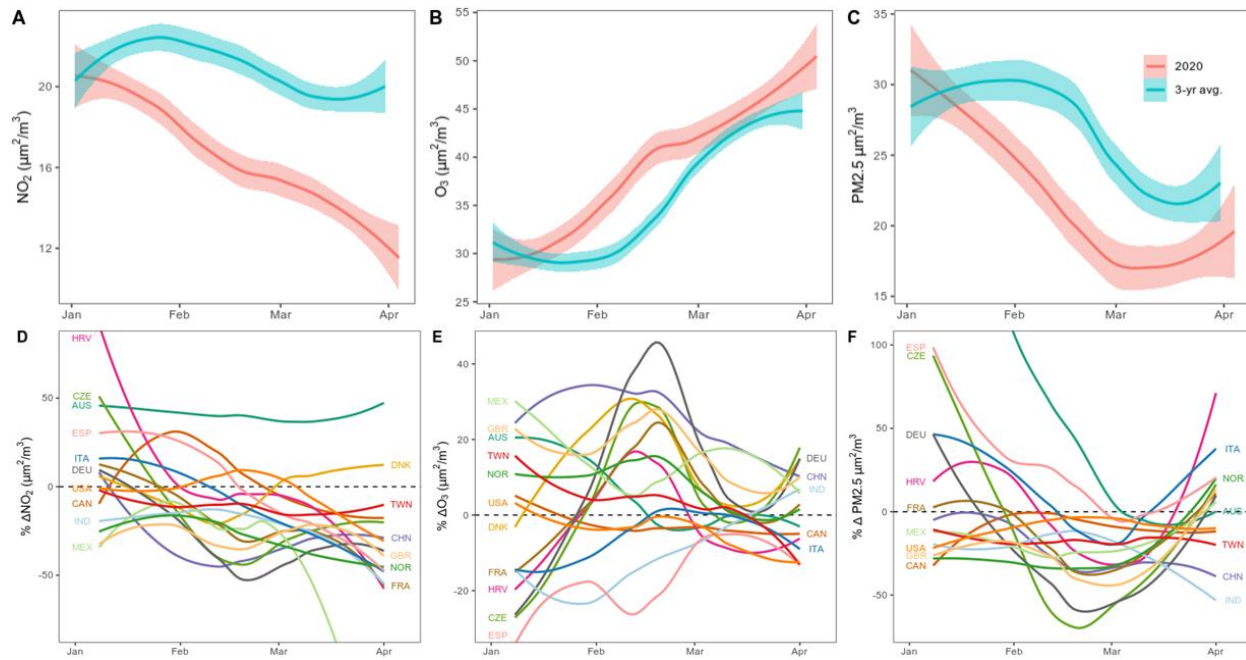

469  
470  
471  
472  
473  
474  
475  
476

**Fig. 2: Ground-level air pollution time series.** Weekly time series for ground station pollutant concentrations are plotted for Feb/Mar 2020 and the 3-yr average for the equivalent weeks (A, B, C). Loess regression lines and 95% confidence interval ribbons show globally averaged trends (n = 30 countries). Country-specific time series showing percentage deviation from long-term means are plotted in D, E and F. For country code reference refer to: [www.iso.org/obp/ui/](http://www.iso.org/obp/ui/)

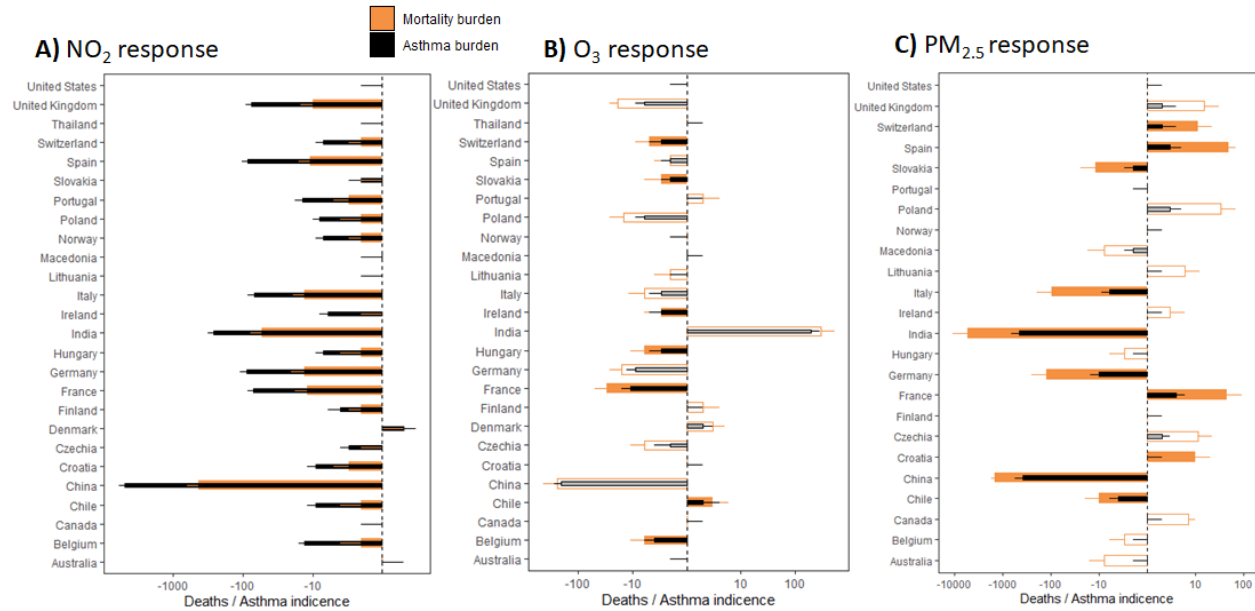

477

478

479

480

481

482

483

484

485

486

**Fig. 3: Post-lockdown health burden changes attributable to air pollution.** Air pollution anomalies during two weeks post-lockdown are converted to mortality and asthma responses (n = 27 countries). Total health burden avoided (-ve) and incurred (+ve) values are presented with bars along a log-transformed x-axis. 95% uncertainty intervals are marked with error bars. Hollow bars represent estimates where the change in pollutant concentrations were not significant (p > 0.05) after accounting for weather variations (Fig. S5).

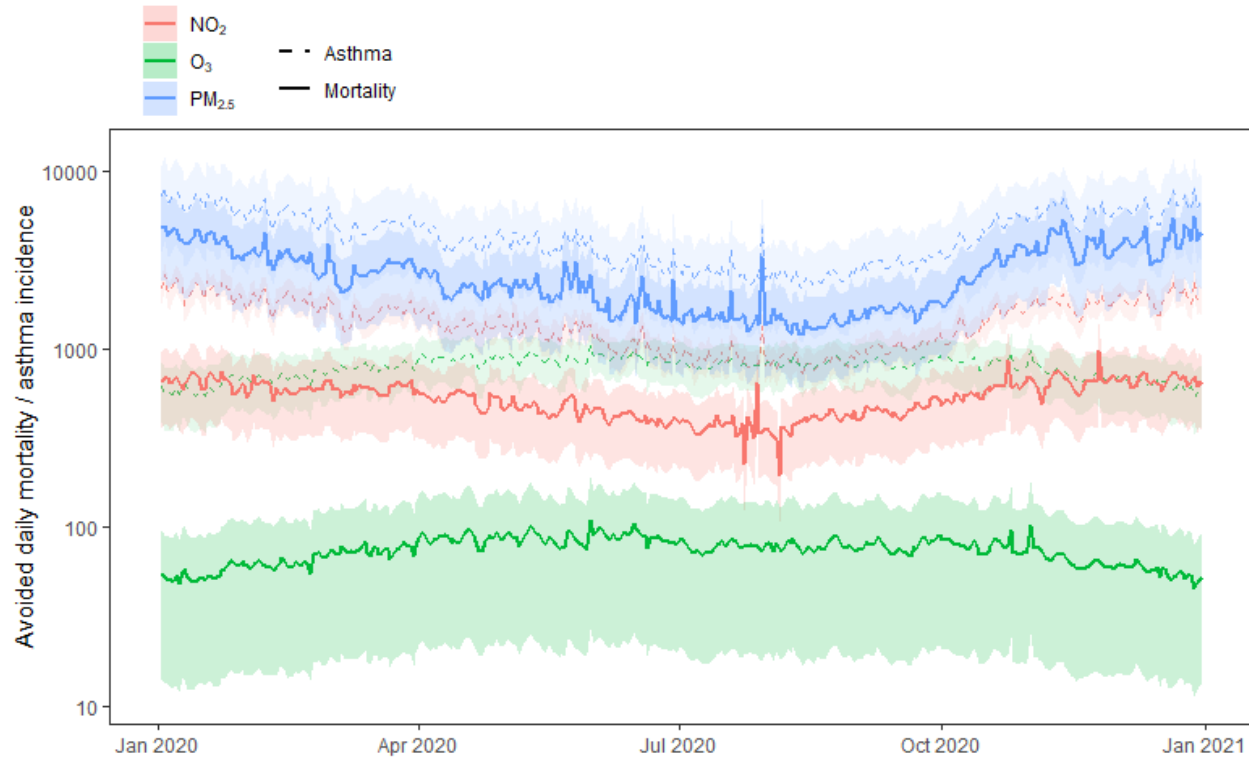

487  
488 **Fig. 4: Projected daily health outcomes over 2020.** Potential daily premature deaths (solid  
489 lines) and asthma incidence (dashed lines) that might be avoided assuming pollutant levels  
490 remain at lockdown levels (NO<sub>2</sub>: -29%; O<sub>3</sub>: -11%; PM<sub>2.5</sub>: -9%). Lines reflect global averages (n =  
491 27 countries) with 95% confidence interval ribbons.  
492  
493  
494



495 Supplementary tables and figures

496

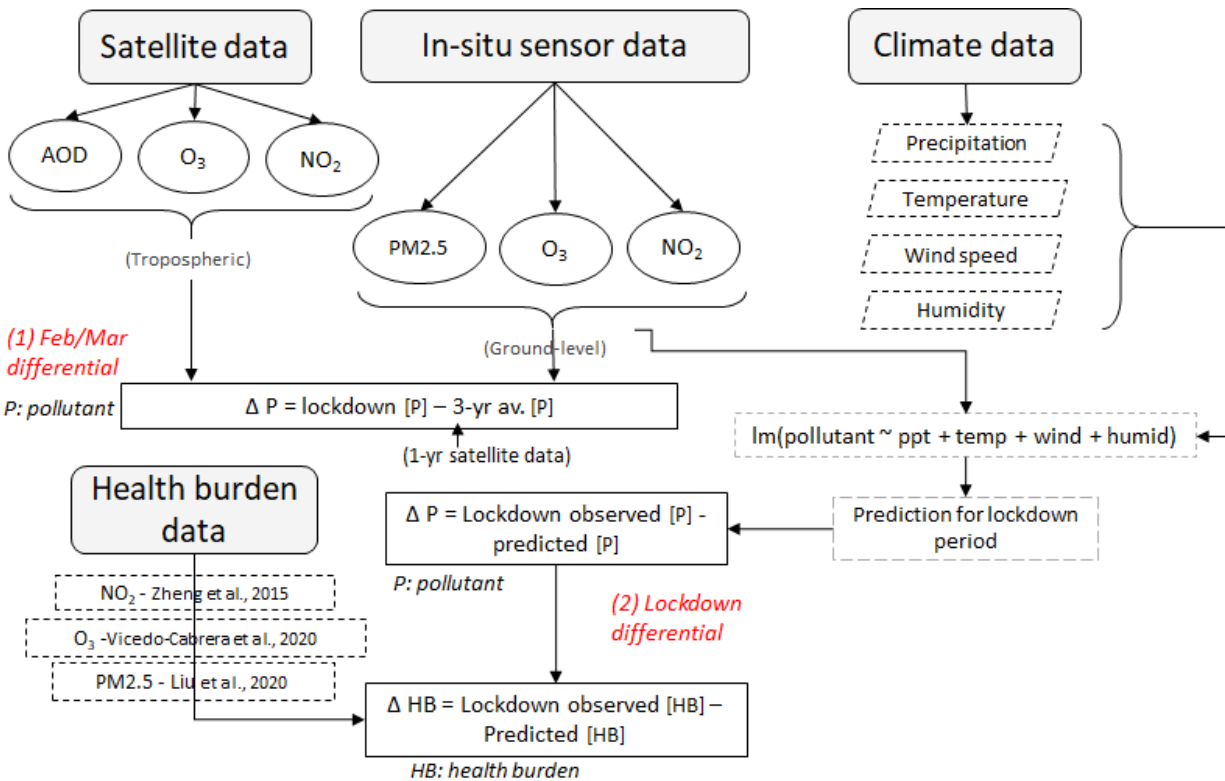

497

498

499 **Fig. S1: Methodological workflow for paper.** Two types of air pollution (*P*) anomaly are  
 500 calculated including *Feb/Mar differential* and *Lockdown differential*. The first is the difference  
 501 between the Feb/Mar 2020 and the average for the same days during the previous three years  
 502 (2017-2019; ground-station data) or one year (satellite data). The *Lockdown differential* is the  
 503 difference between observed and predicted pollutant levels for two weeks post-lockdown.  
 504 Predictions are made to account for the confounding effects of weather variability using a  
 505 regression model. These differentials are used to calculate the change in mortality or asthma  
 506 burden (*HB*) as a result of COVID-19 induced pollution anomalies. Relative risk rate functions  
 507 are extracted from the literature outlined with dashed lines (refer to reference list in main  
 508 manuscript for full references).  
 509

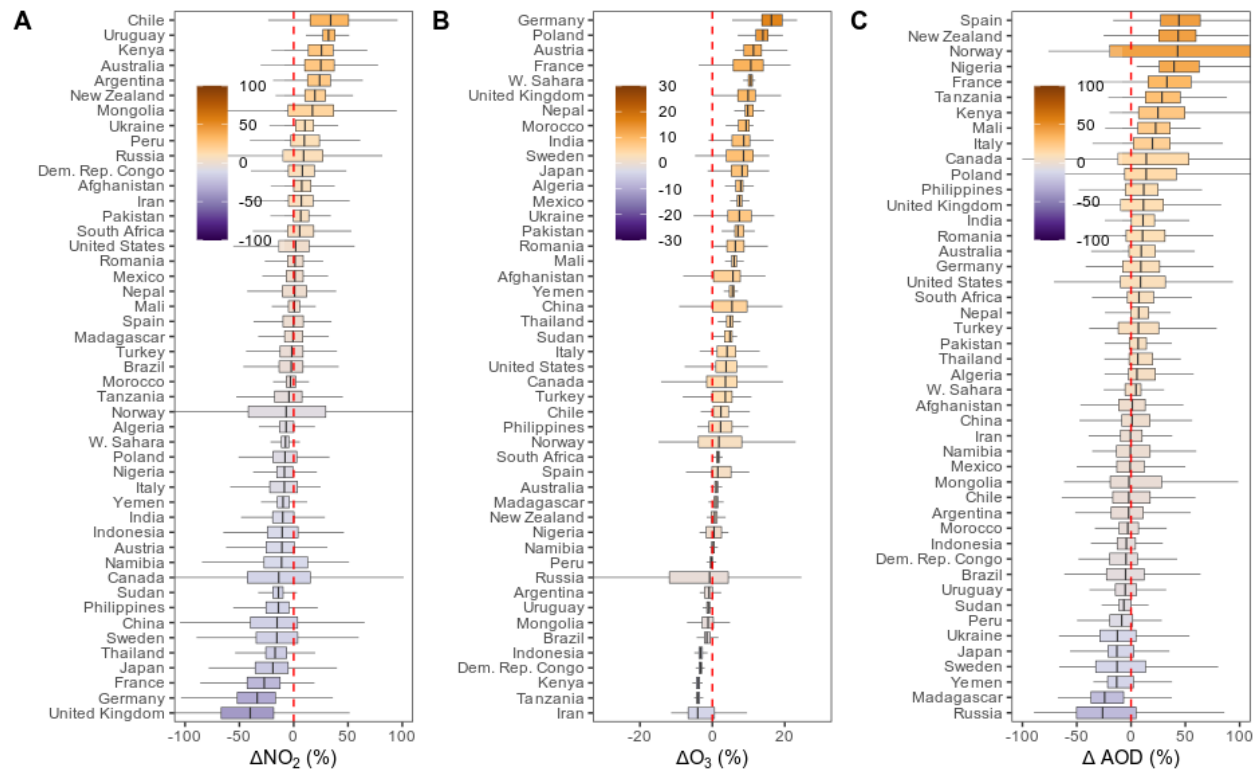

510  
511  
512  
513  
514  
515

**Fig. S2: Satellite-derived air pollution Feb/Mar anomalies.** Percentage temporal differentials (Feb/Mar 2020 vs Feb/Mar 2019) in atmospheric  $\text{NO}_2$ ,  $\text{O}_3$  and aerosol optical depth (AOD) per country. Box and whisker plots show the spread of the data (each data point is a satellite pixel within a country) around the median value.

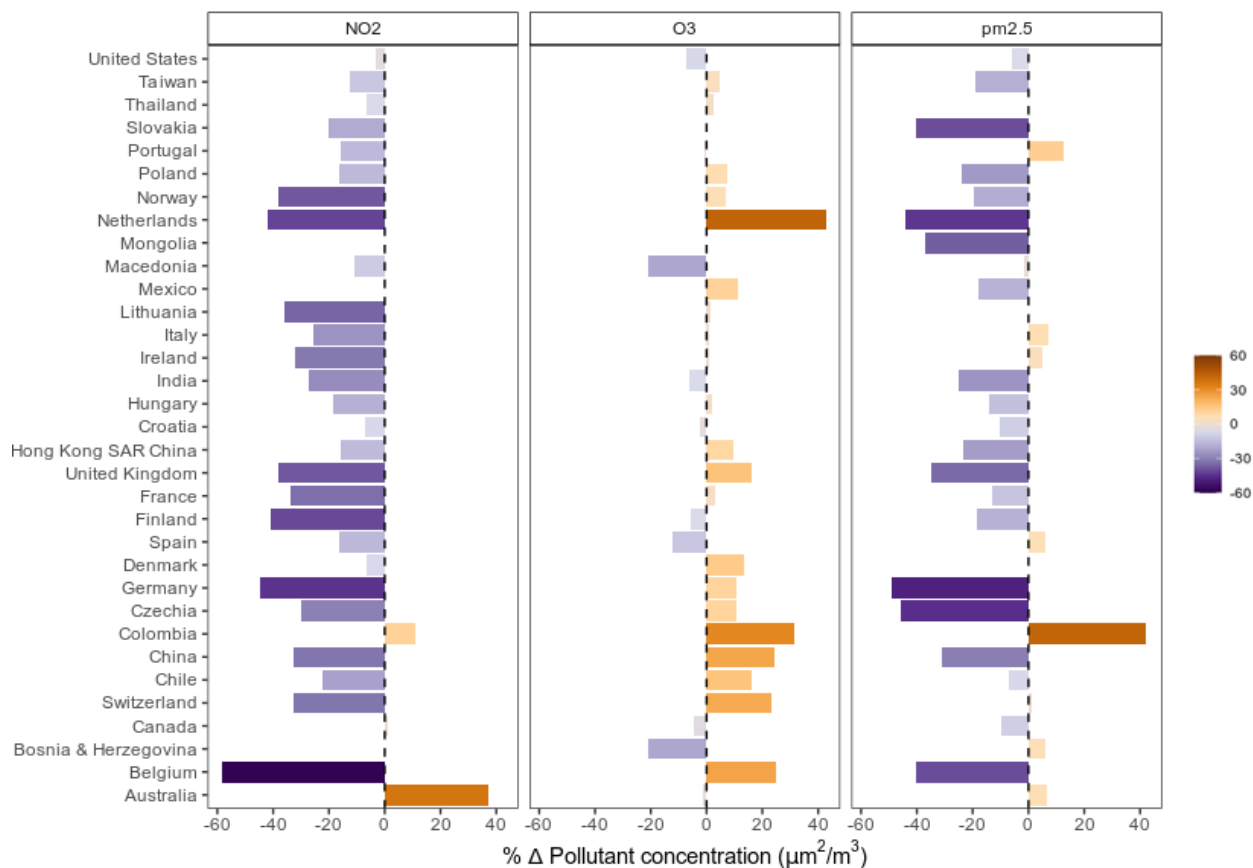

516  
517 **Fig. S3. Ground-level air pollution Feb/Mar anomalies.** Percentage Feb/Mar differentials  
518 (Feb/Mar 2020 vs 3-yr average for Feb/Mar) in atmospheric NO<sub>2</sub>, O<sub>3</sub> and PM<sub>2.5</sub> per country with  
519 air quality station data. Anomalies are expressed as percentage differences with bars.

520  
521

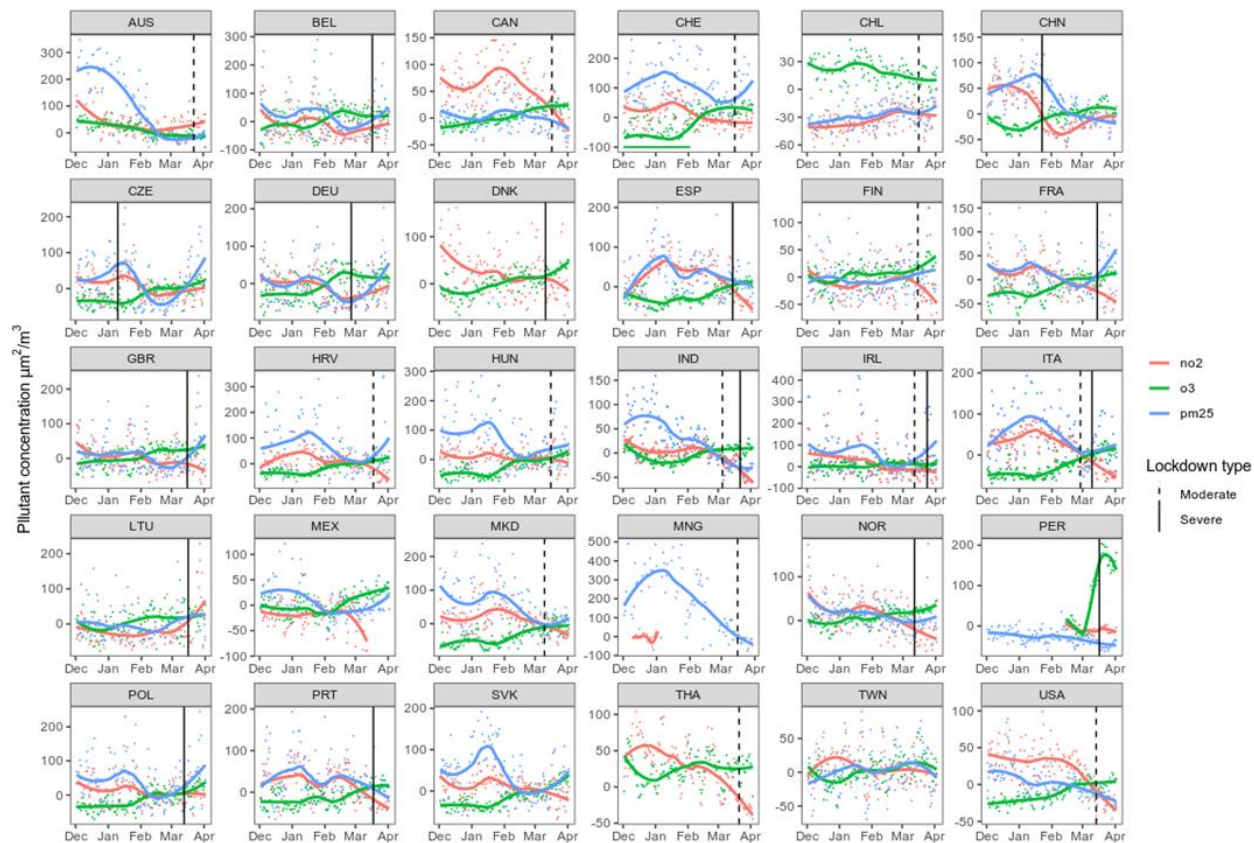

522  
523  
524  
525  
526  
527  
528

**Fig. S4. Pollutant time series and lockdown dates.** Daily time series of ground-level NO<sub>2</sub>, O<sub>3</sub> and PM<sub>2.5</sub> per country with dates of lockdown indicated by vertical lines. Smoothed loess regression lines are fitted to indicate moving averages. For country code reference refer to: [www.iso.org/obp/ui/](http://www.iso.org/obp/ui/)

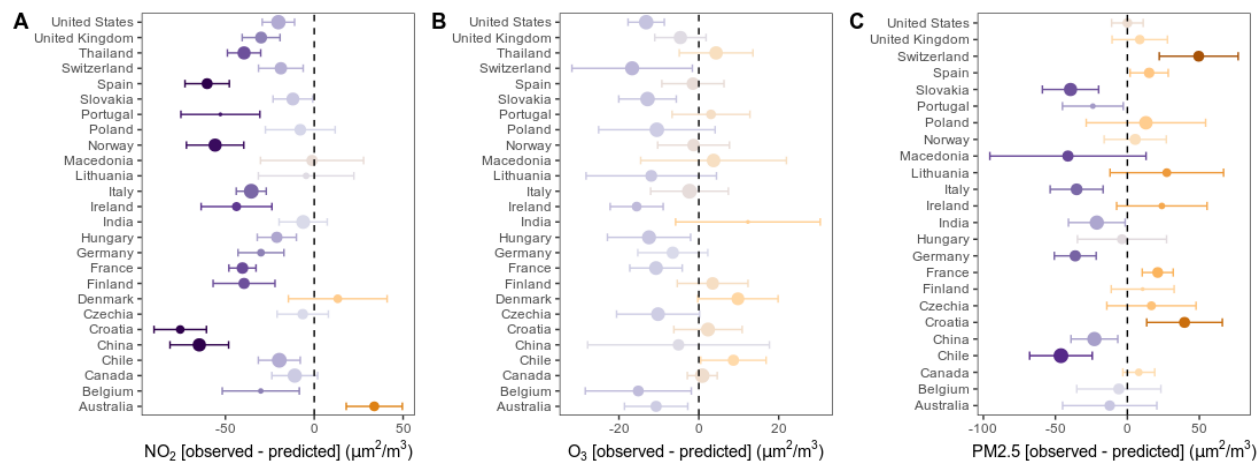

529  
530  
531  
532  
533  
534  
535  
536  
537  
538  
539

**Fig. S5. Ground-level air pollution lockdown anomalies corrected for weather variations.** Percentage lockdown differentials (observed vs predicted concentrations for lockdown dates) in atmospheric NO<sub>2</sub>, O<sub>3</sub> and PM<sub>2.5</sub> per country with air quality station data. Anomalies are expressed as percentage differences with points and 95% confidence intervals with error bars. Predicted values are based on regression models that account for the effects of weather variations during lockdown. Points are sized relative to the R<sup>2</sup> of the model ranging from 0.2 to 0.9.

540 **Table S1. Regression model performance.** Air pollutant concentrations were regressed on  
541 meteorological variables (temperature, humidity, precipitation and wind speed) to predict what  
542 air pollutant concentrations were expected to be during lockdown dates. Separate models were  
543 built for each country and the resulting  $R^2$  and  $p$ -values are presented.  
544  
545

|           | <b>NO<sub>2</sub></b>       |                       | <b>O<sub>3</sub></b>        |                       | <b>PM<sub>2.5</sub></b>     |                       |
|-----------|-----------------------------|-----------------------|-----------------------------|-----------------------|-----------------------------|-----------------------|
|           | <b><i>R</i><sup>2</sup></b> | <b><i>p</i>-value</b> | <b><i>R</i><sup>2</sup></b> | <b><i>p</i>-value</b> | <b><i>R</i><sup>2</sup></b> | <b><i>p</i>-value</b> |
| Australia | 0.432                       | 7.4E-13               | 0.598                       | 6.0E-26               | 0.412                       | 1.5E-13               |
| Belgium   | 0.279                       | 3.1E-05               | 0.583                       | 4.9E-21               | 0.452                       | 2.4E-13               |
| Canada    | 0.775                       | 8.4E-40               | 0.869                       | 1.0E-60               | 0.278                       | 5.3E-06               |
| Chile     | 0.835                       | 7.9E-50               | 0.601                       | 1.1E-24               | 0.786                       | 9.5E-45               |
| China     | 0.682                       | 3.9E-21               | 0.620                       | 4.5E-19               | 0.730                       | 7.4E-34               |
| Croatia   | 0.372                       | 3.7E-09               | 0.815                       | 8.7E-49               | 0.453                       | 1.4E-14               |
| Czechia   | 0.472                       | 4.5E-14               | 0.799                       | 1.9E-46               | 0.332                       | 8.4E-09               |
| Denmark   | 0.376                       | 2.1E-08               | 0.714                       | 1.7E-29               | 0.446                       | 5.2E-05               |
| Finland   | 0.515                       | 1.1E-16               | 0.696                       | 2.0E-33               | 0.209                       | 2.4E-04               |
| France    | 0.547                       | 3.2E-18               | 0.799                       | 9.8E-46               | 0.437                       | 1.1E-13               |
| Germany   | 0.338                       | 1.6E-07               | 0.672                       | 7.6E-30               | 0.468                       | 3.6E-15               |
| Hungary   | 0.527                       | 6.0E-17               | 0.822                       | 1.1E-49               | 0.385                       | 5.1E-11               |
| India     | 0.737                       | 5.5E-25               | 0.367                       | 2.8E-07               | 0.725                       | 2.4E-35               |

---

|                | <b>NO<sub>2</sub></b>       |                       | <b>O<sub>3</sub></b>        |                       | <b>PM<sub>2.5</sub></b>     |                       |
|----------------|-----------------------------|-----------------------|-----------------------------|-----------------------|-----------------------------|-----------------------|
|                | <b><i>R</i><sup>2</sup></b> | <b><i>p-value</i></b> | <b><i>R</i><sup>2</sup></b> | <b><i>p-value</i></b> | <b><i>R</i><sup>2</sup></b> | <b><i>p-value</i></b> |
| Ireland        | 0.394                       | 2.1E-09               | 0.519                       | 2.1E-17               | 0.245                       | 4.1E-04               |
| Italy          | 0.829                       | 3.5E-40               | 0.897                       | 1.8E-57               | 0.505                       | 2.8E-14               |
| Lithuania      | 0.301                       | 3.7E-05               | 0.640                       | 2.0E-23               | 0.325                       | 4.1E-07               |
| Macedonia      | 0.522                       | 5.6E-17               | 0.781                       | 1.2E-43               | 0.464                       | 3.7E-10               |
| Norway         | 0.668                       | 6.0E-29               | 0.686                       | 2.6E-33               | 0.455                       | 1.6E-15               |
| Peru           | 0.450                       | 2.2E-03               | 0.820                       | 2.9E-17               | 0.406                       | 6.7E-10               |
| Poland         | 0.549                       | 7.5E-07               | 0.870                       | 1.9E-25               | 0.653                       | 1.1E-11               |
| Portugal       | 0.266                       | 3.6E-04               | 0.513                       | 2.3E-15               | 0.223                       | 6.6E-04               |
| Slovakia       | 0.648                       | 6.7E-22               | 0.866                       | 4.8E-51               | 0.626                       | 1.3E-22               |
| Spain          | 0.503                       | 8.4E-16               | 0.693                       | 7.8E-33               | 0.416                       | 7.5E-13               |
| Switzerland    | 0.605                       | 4.4E-16               | 0.829                       | 2.4E-38               | 0.446                       | 2.3E-10               |
| Thailand       | 0.670                       | 1.0E-28               | 0.757                       | 3.6E-41               | 0.453                       | 5.7E-05               |
| United Kingdom | 0.569                       | 8.4E-21               | 0.750                       | 7.5E-41               | 0.360                       | 1.8E-10               |
| United States  | 0.795                       | 1.2E-42               | 0.865                       | 3.4E-59               | 0.368                       | 1.2E-09               |

---

546  
547  
548

549 **Table S2. Lockdown health burden response.** Pollutant-related mortality and pediatric  
 550 asthma cases avoided for each country during two weeks of lockdown. Country averages and  
 551 95% confidence intervals are reported with negative (-) signs representing cases where health  
 552 burden has increased. Numbers are rounded to the nearest whole number. Values with  
 553 significant ( $p < 0.05$ ) pollutant anomalies after correcting for meteorological parameters are  
 554 indicated with \*.  
 555

| Country   | Mortality       |                |                    | Asthma             |                |                   |
|-----------|-----------------|----------------|--------------------|--------------------|----------------|-------------------|
|           | NO <sub>2</sub> | O <sub>3</sub> | PM <sub>2.5</sub>  | NO <sub>2</sub>    | O <sub>3</sub> | PM <sub>2.5</sub> |
| Australia | 0 [0; 0]*       | 0 [0; 0]*      | 7 [-1; 14]         | 0 [0; 0]*          | 0 [0; 0]*      | 0 [0; 0]          |
| Belgium   | 1 [1; 2]*       | 5 [1; 9]*      | 2 [0; 5]           | 12 [9; 14]*        | 3 [2; 4]*      | 0 [0; 0]          |
| Canada    | 0 [0; 0]        | 0 [0; 0]       | -6 [-4; -8]        | 0 [0; 0]           | 0 [0; 0]       | 0 [0; 0]          |
| Chile     | 1 [1; 2]*       | -2 [-1; -4]*   | 9 [-23; 42]*       | 8 [6; 9]*          | -1 [-1; -2]*   | 3 [1; 3]*         |
| China     | 427 [235; 619]* | 247 [35; 440]  | 1444 [1127; 1761]* | 4992 [3973; 5962]* | 212 [127; 265] | 381 [143; 478]*   |
| Croatia   | 2 [1; 2]*       | 0 [0; -1]      | -9 [2; -21]*       | 8 [6; 10]*         | 0 [0; 0]       | 0 [0; -1]*        |
| Czechia   | 0 [0; 0]        | 5 [1; 9]       | -10 [2; -23]       | 2 [1; 2]           | 1 [1; 2]       | -1 [0; -1]        |
| Denmark   | 0 [0; 0]        | -2 [-1; -3]    | 0 [0; 0]           | -1 [-1; -1]        | -1 [0; -1]     | 0 [0; 0]          |
| Finland   | 1 [0; 1]*       | -1 [0; -1]     | 0 [1; -1]          | 3 [2; 3]*          | 0 [0; 0]       | 0 [0; 0]          |
| France    | 11 [6; 16]*     | 29 [9; 47]*    | -44 [8; -97]*      | 69 [55; 84]*       | 10 [6; 14]*    | -3 [-1; -4]*      |
| Germany   | 12 [7; 18]*     | 15 [5; 25]     | 125 [-23; 276]*    | 88 [70; 106]*      | 8 [4; 10]      | 9 [3; 11]*        |
| Hungary   | 1 [1; 2]*       | 5 [1; 8]*      | 2 [0; 5]           | 6 [5; 7]*          | 2 [1; 2]*      | 0 [0; 0]          |



| Country        | Mortality       |                  |                    | Asthma          |                   |                   |
|----------------|-----------------|------------------|--------------------|-----------------|-------------------|-------------------|
|                | NO <sub>2</sub> | O <sub>3</sub>   | PM <sub>2.5</sub>  | NO <sub>2</sub> | O <sub>3</sub>    | PM <sub>2.5</sub> |
| India          | 52 [29; 76]     | -300 [-77; -522] | 5313 [998; 11763]* | 259 [207; 308]  | -197 [-106; -273] | 460 [174; 576]*   |
| Ireland        | 0 [0; 1]*       | 2 [1; 4]*        | -2 [0; -4]         | 5 [4; 6]*       | 2 [1; 2]*         | 0 [0; 0]          |
| Italy          | 12 [7; 17]*     | 5 [1; 10]        | 97 [-18; 214]*     | 68 [54; 81]*    | 2 [1; 2]          | 5 [2; 6]*         |
| Lithuania      | 0 [0; 0]        | 1 [0; 2]         | -5 [1; -10]        | 0 [0; 0]        | 0 [0; 1]          | 0 [0; 0]          |
| Macedonia      | 0 [0; 0]        | 0 [0; 0]         | 7 [-1; 16]         | 0 [0; 0]        | 0 [0; 0]          | 1 [0; 1]          |
| Norway         | 1 [0; 1]*       | 0 [0; 0]         | 0 [0; -1]          | 6 [4; 7]*       | 0 [0; 0]          | 0 [0; 0]          |
| Poland         | 1 [1; 2]        | 14 [4; 24]       | -33 [6; -73]       | 7 [6; 9]        | 5 [3; 7]          | -2 [-1; -3]       |
| Portugal       | 2 [1; 3]*       | -1 [0; -2]       | 0 [-8; 8]*         | 13 [11; 16]*    | 0 [0; -1]         | 0 [0; 0]*         |
| Slovakia       | 0 [0; 0]*       | 2 [1; 4]*        | 11 [-2; 25]*       | 1 [1; 2]*       | 1 [0; 1]*         | 1 [0; 1]*         |
| Spain          | 10 [5; 14]*     | 1 [-1; 3]        | -48 [-29; -68]*    | 83 [65; 100]*   | 1 [1; 2]          | -2 [-1; -2]*      |
| Switzerland    | 1 [0; 1]*       | 4 [1; 7]*        | -10 [12; -33]*     | 6 [5; 7]*       | 2 [1; 3]*         | -1 [0; -1]*       |
| Thailand       | 0 [0; 0]*       | 0 [0; 0]         | -14 [3; -32]       | 0 [0; 0]*       | 0 [0; 0]          | -1 [0; -2]        |
| United Kingdom | 9 [5; 13]*      | 18 [12; 24]      | 0 [0; 0]           | 73 [58; 88]*    | 5 [3; 7]          | 0 [0; 0]          |
| United States  | 0 [0; 0]*       | 0 [0; 0]*        | 0 [0; 0]           | 0 [0; 0]*       | 0 [0; 0]*         | 0 [0; 0]          |

556  
557  
558

559 **Table S3. Projected health burden response.** Potential premature deaths and asthma  
 560 incidence that might be avoided between April and December 2020 assuming pollutant levels  
 561 remain at lockdown levels (NO<sub>2</sub>: -29%; O<sub>3</sub>: -11%; PM<sub>2.5</sub>: -9%). Country averages and 95%  
 562 confidence intervals are reported. Numbers are rounded to the nearest whole number. Values  
 563 with significant (p < 0.05) pollutant anomalies after correcting for meteorological parameters are  
 564 indicated with \*.  
 565  
 566

| Country   | Mortality             |                     |                         | Asthma                   |                        |                          |
|-----------|-----------------------|---------------------|-------------------------|--------------------------|------------------------|--------------------------|
|           | NO <sub>2</sub>       | O <sub>3</sub>      | PM <sub>2.5</sub>       | NO <sub>2</sub>          | O <sub>3</sub>         | PM <sub>2.5</sub>        |
| Australia | 0 [0; 0]*             | 0 [0; 0]*           | 1183 [-100; 2490]       | 271 [212; 329]*          | 1 [0; 1]*              | 720 [244; 951]           |
| Belgium   | 375 [206; 544]*       | 66 [17; 115]*       | 743 [-140; 1645]        | 412 [323; 500]*          | 554 [303; 760]*        | 985 [336; 1299]          |
| Canada    | 0 [0; 1]              | 0 [0; 0]            | 1501 [1033; 1969]       | 187 [147; 228]           | 1 [0; 1]               | 598 [203; 790]           |
| Chile     | 566 [311; 820]*       | 52 [13; 90]*        | 566 [-1424; 2577]*      | 834 [659; 1004]*         | 402 [213; 568]*        | 2251 [783; 2940]*        |
| China     | 53168 [29267; 77028]* | 11900 [1707; 21169] | 106239 [82918; 129560]* | 184362 [146185; 221065]* | 138422 [84473; 170702] | 434338 [152711; 564220]* |
| Croatia   | 165 [91; 239]*        | 44 [11; 76]         | 429 [-81; 950]*         | 142 [111; 172]*          | 194 [111; 255]         | 321 [110; 422]*          |
| Czechia   | 337 [186; 489]        | 107 [12; 196]       | 1127 [-212; 2495]       | 419 [329; 508]           | 478 [273; 628]         | 893 [306; 1174]          |
| Denmark   | 82 [45; 118]          | 36 [9; 63]          |                         | 0 [0; 0]                 | 196 [110; 262]         |                          |
| Finland   | 104 [57; 151]*        | 42 [11; 72]         | 27 [-104; 158]          | 63 [49; 76]*             | 204 [114; 274]         | 148 [50; 195]            |
| France    | 2102 [1157; 3046]*    | 588 [186; 960]*     | 3911 [-735; 8658]*      | 1584 [1240; 1924]*       | 3016 [1700; 4020]*     | 3699 [1259; 4882]*       |
| Germany   | 3216 [1770; ]         | 497 [165; 796]      | 6606 [-1241; 14627]*    | 3087 [2418; 3745]*       | 3516 [1933; 4803]      | 6464 [2205; 8522]*       |

| Country     | Mortality            |                   |                           | Asthma                  |                      |                          |
|-------------|----------------------|-------------------|---------------------------|-------------------------|----------------------|--------------------------|
|             | NO <sub>2</sub>      | O <sub>3</sub>    | PM <sub>2.5</sub>         | NO <sub>2</sub>         | O <sub>3</sub>       | PM <sub>2.5</sub>        |
|             | 4661]*               |                   |                           |                         |                      |                          |
| Hungary     | 448 [247; 650]*      | 86 [22; 149]*     | 1115 [-209; 2469]         | 371 [291; 450]*         | 391 [218; 528]*      | 826 [283; 1086]          |
| India       | 61323 [33762; 88829] | 5053 [1299; 8807] | 464884 [-87318; 1029256]* | 136241 [110166; 160303] | 46895 [25231; 65438] | 580762 [214905; 736696]* |
| Ireland     | 96 [53; 139]*        | 27 [7; 47]*       | 162 [-30; 359]            | 116 [91; 141]*          | 308 [172; 415]*      | 302 [103; 398]           |
| Italy       | 2493 [1372; 3613]*   | 557 [93; 1052]    | 4791 [-900; 10608]*       | 1792 [1405; 2174]*      | 2266 [1282; 3011]    | 3417 [1166; 4503]*       |
| Lithuania   | 85 [47; 123]         | 24 [6; 42]        | 311 [-58; 689]            | 98 [77; 119]            | 113 [62; 155]        | 229 [78; 302]            |
| Macedonia   | 62 [34; 90]          | 13 [3; 22]        | 339 [-64; 750]            | 144 [114; 174]          | 87 [48; 119]         | 366 [127; 477]           |
| Norway      | 121 [67; 175]*       | 26 [7; 46]        | 135 [-25; 300]            | 55 [43; 67]*            | 196 [110; 263]       | 168 [57; 222]            |
| Poland      | 1147 [631; 1662]     | 307 [79; 533]     | 4440 [-834; 9830]         | 1764 [1388; 2132]       | 1623 [911; 2173]     | 3833 [1321; 5029]        |
| Portugal    | 336 [185; 487]*      | 57 [-16; 135]     | 16 [-612; 650]*           | 197 [154; 240]*         | 420 [236; 561]       | 403 [137; 532]*          |
| Slovakia    | 162 [89; 234]*       | 46 [12; 79]*      | 482 [-91; 1068]*          | 172 [135; 209]*         | 219 [124; 290]*      | 389 [133; 511]*          |
| Spain       | 1207 [664; 1749]*    | 136 [-181; 430]   | 5998 [3611; 8415]*        | 1616 [1265; 1962]*      | 2418 [1360; 3230]    | 3015 [1026; 3979]*       |
| Switzerland | 241 [133; 349]*      | 63 [10; 113]*     | 342 [-415; 1116]*         | 279 [218; 339]*         | 451 [258; 595]*      | 559 [191; 738]*          |
| Thailand    | 2 [1; 3]*            | 0 [0; 0]          |                           | 0 [0; 0]                | 2 [1; 3]             |                          |

| Country        | Mortality          |                 |                      | Asthma             |                   |                     |
|----------------|--------------------|-----------------|----------------------|--------------------|-------------------|---------------------|
|                | NO <sub>2</sub>    | O <sub>3</sub>  | PM <sub>2.5</sub>    | NO <sub>2</sub>    | O <sub>3</sub>    | PM <sub>2.5</sub>   |
| United Kingdom | 2337 [1286; 3386]* | 843 [577; 1109] | 23130 [18738; 27522] | 1886 [1476; 2291]* | 3547 [1960; 4821] | 10426 [3541; 13772] |
| United States  | 8 [5; 12]*         | 2 [1; 3]*       | 0 [0; 0]             | 3506 [2742; 4261]* | 13 [6; 19]*       | 0 [0; 0]            |

567

568

569
